# Supplementary material
Source: PubMed Central journal article supplement (PMC2823628)
Supplement: NIHMS168365-supplement-Appendix.pdf [file NIHMS168365-supplement-Appendix.pdf]

**Table 1. Secondary Quality of Life Measures by Intention to Treat**

|                                             |        | <b>Amiodarone</b> | <b>Placebo</b> | <b>ICD</b>   | <b>AMIO-Placebo*</b> | <b>ICD-Placebo*</b>     |
|---------------------------------------------|--------|-------------------|----------------|--------------|----------------------|-------------------------|
| <b>SF role function – physical (0-100)†</b> |        |                   |                |              |                      |                         |
| Baseline                                    | N      | 820               | 821            | 797          |                      |                         |
|                                             | median | 25 (0,50)         | 0 (0,50)       | 25 (0,50)    |                      |                         |
|                                             | mean   | 32.7±37.2         | 30.6±38.4      | 31.4±38.3    | 2.12 (-1.54,5.78)    | 0.77 (-2.97,4.51)       |
| 3 months                                    | N      | 740               | 757            | 743          |                      |                         |
|                                             | median | 25 (0,75)         | 25 (0,75)      | 25 (0,75)    |                      |                         |
|                                             | mean   | 41.2±39.2         | 39.2±40.5      | 43.6±39.8    | 2.04 (-2.00,6.08)    | <b>4.41 (0.34,8.47)</b> |
| 1 year                                      | N      | 665               | 684            | 719          |                      |                         |
|                                             | median | 50 (0,75)         | 25 (0,100)     | 50 (0,100)   |                      |                         |
|                                             | mean   | 45.0±40.0         | 43.2±40.9      | 46.9±40.8    | 1.75 (-2.57,6.07)    | 3.64 (-0.63,7.92)       |
| 30 months                                   | N      | 541               | 556            | 634          |                      |                         |
|                                             | median | 25 (0,100)        | 25 (0,75)      | 25 (0,100)   |                      |                         |
|                                             | mean   | 44.4±40.6         | 40.6±41.0      | 44.2±40.8    | 3.82 (-1.01,8.66)    | 3.61 (-1.05,8.28)       |
| <b>SF role function – emotional (0-100)</b> |        |                   |                |              |                      |                         |
| Baseline                                    | N      | 821               | 820            | 798          |                      |                         |
|                                             | median | 100 (33,100)      | 100 (33,100)   | 100 (33,100) |                      |                         |
|                                             | mean   | 65.9±41.03        | 62.9±42.5      | 66.3±41.4    | 3.01 (-1.04,7.06)    | 3.38 (-0.71,7.48)       |
| 3 months                                    | N      | 738               | 758            | 742          |                      |                         |
|                                             | median | 100 (33,100)      | 100 (33,100)   | 100 (33,100) |                      |                         |
|                                             | mean   | 70.3±39.9         | 66.6±41.8      | 72.0±38.9    | 3.72 (-0.42,7.87)    | <b>5.46 (1.37,9.54)</b> |
| 1 year                                      | N      | 666               | 682            | 720          |                      |                         |
|                                             | median | 100 (33,100)      | 100 (33,100)   | 100 (33,100) |                      |                         |
|                                             | mean   | 69.7±40.0         | 67.7±41.3      | 71.9±38.3    | 2.00 (-2.34,6.35)    | <b>4.21 (0.04,8.37)</b> |

Quality of Life with Defibrillator Therapy or Amiodarone in Heart Failure  
Mark D.B., et al.  
Supplementary Appendix

|                                   |        |              |              |              |                         |                         |
|-----------------------------------|--------|--------------|--------------|--------------|-------------------------|-------------------------|
| 30 months                         | N      | 541          | 554          | 631          |                         |                         |
|                                   | median | 100 (33,100) | 100 (33,100) | 100 (33,100) |                         |                         |
|                                   | mean   | 71.3±40.4    | 69.6±41.2    | 68.9±41.4    | 1.64 (-3.20,6.48)       | -0.76 (-5.48,3.96)      |
| <b>SF general health (0-100)</b>  |        |              |              |              |                         |                         |
| Baseline                          | N      | 826          | 829          | 814          |                         |                         |
|                                   | median | 42 (30,57)   | 40 (25,60)   | 45 (30,60)   |                         |                         |
|                                   | mean   | 44.6±21.4    | 43.8±22.2    | 45.2±20.9    | 0.83 (-1.27,2.93)       | 1.42 (-0.66,3.51)       |
| 3 months                          | N      | 754          | 764          | 759          |                         |                         |
|                                   | median | 45 (30,62)   | 45 (29,62)   | 47 (32,65)   |                         |                         |
|                                   | mean   | 46.2±22.0    | 45.6±23.1    | 48.8±21.7    | 0.69 (-1.58,2.96)       | <b>3.28 (1.02,5.53)</b> |
| 1 year                            | N      | 669          | 692          | 726          |                         |                         |
|                                   | median | 45 (30,62)   | 45 (27,62)   | 47 (30,67)   |                         |                         |
|                                   | mean   | 46.9±22.8    | 45.8±23.37   | 49.0±22.7    | 1.07 (-1.39,3.52)       | <b>3.16 (0.76,5.56)</b> |
| 30 months                         | N      | 558          | 561          | 646          |                         |                         |
|                                   | median | 45 (30,62)   | 45 (30,62)   | 42 (30,62)   |                         |                         |
|                                   | mean   | 45.9±22.4    | 45.4±23.4    | 46.1±22.1    | 0.53 (-2.16,3.22)       | 0.72 (-1.85,3.29)       |
| <b>SF social function (0-100)</b> |        |              |              |              |                         |                         |
| Baseline                          | N      | 828          | 831          | 816          |                         |                         |
|                                   | median | 75 (50,100)  | 75 (50,100)  | 75 (50,100)  |                         |                         |
|                                   | mean   | 69.3±27.8    | 66.6±28.7    | 68.2±28.0    | <b>2.75 (0.03,5.47)</b> | 1.61 (-1.13,4.35)       |
| 3 months                          | N      | 760          | 770          | 764          |                         |                         |
|                                   | median | 75 (50,100)  | 75 (50,100)  | 75 (50,100)  |                         |                         |
|                                   | mean   | 71.3±27.4    | 70.2±28.0    | 73.7±25.6    | 1.09 (-1.69,3.86)       | <b>3.50 (0.81,6.18)</b> |
| 1 year                            | N      | 678          | 695          | 735          |                         |                         |
|                                   | median | 75 (50,100)  | 75 (50,100)  | 75 (50,100)  |                         |                         |
|                                   | mean   | 71.4±26.6    | 70.9±26.8    | 74.7±25.1    | 0.49 (-2.34,3.31)       | <b>3.81 (1.12,6.50)</b> |
| 30 months                         | N      | 560          | 571          | 657          |                         |                         |
|                                   | median | 75 (50,100)  | 75 (50,100)  | 75 (50,100)  |                         |                         |
|                                   | mean   | 71.8±26.6    | 70.3±27.0    | 71.2±26.2    | 1.49 (-1.63,4.62)       | 0.92 (-2.06,3.90)       |

Quality of Life with Defibrillator Therapy or Amiodarone in Heart Failure  
Mark D.B., et al.  
Supplementary Appendix

**SF pain index (0-100)**

|           |        |             |            |             |                         |                         |
|-----------|--------|-------------|------------|-------------|-------------------------|-------------------------|
| Baseline  | N      | 828         | 828        | 813         |                         |                         |
|           | median | 64 (41,84)  | 62 (41,84) | 64 (41,84)  |                         |                         |
|           | mean   | 65.1±25.8   | 62.5±27.1  | 64.9±26.5   | <b>2.63 (0.04,5.22)</b> | 2.43 (-0.16,5.02)       |
| 3 months  | N      | 761         | 770        | 764         |                         |                         |
|           | median | 72 (51,100) | 62 (41,84) | 72 (42,100) |                         |                         |
|           | mean   | 68.8±26.7   | 62.9±27.7  | 68.0±25.5   | <b>5.90 (3.18,8.62)</b> | <b>5.08 (2.42,7.75)</b> |
| 1 year    | N      | 677         | 695        | 736         |                         |                         |
|           | median | 72 (42,100) | 62 (41,84) | 72 (42,84)  |                         |                         |
|           | mean   | 66.9±26.6   | 62.6±26.7  | 67.3±26.1   | <b>4.33 (1.51,7.16)</b> | <b>4.69 (1.95,7.42)</b> |
| 30 months | N      | 561         | 570        | 657         |                         |                         |
|           | median | 72 (41,100) | 62 (41,84) | 64 (41,84)  |                         |                         |
|           | mean   | 67.8±27.5   | 62.1±26.1  | 64.0±26.0   | <b>5.71 (2.59,8.83)</b> | 1.94 (-0.98,4.86)       |

**SF vitality (0-100)**

|           |        |            |            |            |                   |                         |
|-----------|--------|------------|------------|------------|-------------------|-------------------------|
| Baseline  | N      | 827        | 830        | 814        |                   |                         |
|           | median | 45 (30,60) | 45 (25,60) | 40 (25,55) |                   |                         |
|           | mean   | 44.3±22.4  | 43.0±23.3  | 42.4±22.2  | 1.27 (-0.94,3.47) | -0.63 (-2.84,1.57)      |
| 3 months  | N      | 760        | 768        | 764        |                   |                         |
|           | median | 50 (30,65) | 45 (30,65) | 50 (30,65) |                   |                         |
|           | mean   | 46.1±23.6  | 45.7±24.1  | 48.2±22.7  | 0.47 (-1.93,2.86) | <b>2.56 (0.22,4.91)</b> |
| 1 year    | N      | 674        | 693        | 734        |                   |                         |
|           | median | 50 (30,65) | 50 (30,65) | 50 (35,65) |                   |                         |
|           | mean   | 47.8±23.5  | 46.4±23.6  | 48.2±22.6  | 1.33 (-1.17,3.83) | 1.79 (-0.61,4.19)       |
| 30 months | N      | 561        | 565        | 654        |                   |                         |
|           | median | 50 (30,60) | 50 (30,65) | 50 (30,60) |                   |                         |
|           | mean   | 46.5±23.2  | 46.0±23.4  | 46.3±22.4  | 0.49 (-2.24,3.21) | 0.27 (-2.31,2.84)       |

**Bed days**

|          |   |     |     |     |
|----------|---|-----|-----|-----|
| Baseline | N | 814 | 823 | 811 |
|----------|---|-----|-----|-----|

Quality of Life with Defibrillator Therapy or Amiodarone in Heart Failure  
Mark D.B., et al.  
Supplementary Appendix

|                        |        |             |             |             |                    |                            |
|------------------------|--------|-------------|-------------|-------------|--------------------|----------------------------|
|                        | median | 0 (0,2)     | 0 (0,2)     | 0 (0,2)     |                    |                            |
|                        | mean   | 2.1±5.0     | 2.3±5.5     | 2.1±4.8     | -0.20 (-0.71,0.31) | -0.19 (-0.69,0.31)         |
| 3 months               | N      | 750         | 761         | 759         |                    |                            |
|                        | median | 0 (0,1)     | 0 (0,1)     | 0 (0,1)     |                    |                            |
|                        | mean   | 1.7±4.5     | 2.0±4.9     | 1.7±4.5     | -0.27 (-0.74,0.21) | -0.34 (-0.81,0.13)         |
| 1 year                 | N      | 660         | 690         | 723         |                    |                            |
|                        | median | 0 (0,1)     | 0 (0,1)     | 0 (0,0)     |                    |                            |
|                        | mean   | 1.8±4.8     | 1.9±4.8     | 1.4±3.5     | -0.04 (-0.55,0.48) | <b>-0.47 (-0.91,-0.03)</b> |
| 30 months              | N      | 546         | 567         | 646         |                    |                            |
|                        | median | 0 (0,1)     | 0 (0,1)     | 0 (0,1)     |                    |                            |
|                        | mean   | 1.9±4.7     | 2.3±5.4     | 1.8±4.6     | -0.40 (-0.99,0.19) | -0.44 (-1.00,0.13)         |
| <b>Disability days</b> |        |             |             |             |                    |                            |
| Baseline               | N      | 811         | 821         | 807         |                    |                            |
|                        | median | 2 (0,15)    | 3 (0,15)    | 3 (0,15)    |                    |                            |
|                        | mean   | 8.3±10.7    | 8.4±10.6    | 8.7±10.6    | -0.11 (-1.15,0.92) | 0.31 (-0.72,1.33)          |
| 3 months               | N      | 749         | 758         | 754         |                    |                            |
|                        | median | 0 (0,10)    | 1 (0,10)    | 0 (0,7)     |                    |                            |
|                        | mean   | 6.9±10.2    | 6.7±9.7     | 5.7±9.1     | 0.26 (-0.75,1.26)  | -0.91 (-1.86,0.04)         |
| 1 year                 | N      | 653         | 687         | 725         |                    |                            |
|                        | median | 1 (0,10)    | 0 (0,10)    | 0 (0,7)     |                    |                            |
|                        | mean   | 6.4±9.5     | 6.2±9.6     | 5.7±9.1     | 0.12 (-0.91,1.14)  | -0.56 (-1.53,0.42)         |
| 30 months              | N      | 545         | 563         | 643         |                    |                            |
|                        | median | 0 (0,10)    | 0 (0,10)    | 0 (0,10)    |                    |                            |
|                        | mean   | 6.2±9.5     | 5.9±9.0     | 5.9±8.9     | 0.28 (-0.82,1.37)  | -0.02 (-1.03,1.00)         |
| <b>Driving a car</b>   |        |             |             |             |                    |                            |
| Baseline               | N      | 827         | 833         | 814         |                    |                            |
|                        | yes    | 710 (85.9%) | 700 (84.0%) | 705 (86.6%) | 0.03††             | 0.14††                     |
| 3 months               | N      | 756         | 770         | 767         |                    |                            |

Quality of Life with Defibrillator Therapy or Amiodarone in Heart Failure  
Mark D.B., et al.  
Supplementary Appendix

|                                  |     |             |             |             |        |               |
|----------------------------------|-----|-------------|-------------|-------------|--------|---------------|
|                                  | yes | 637 (84.3%) | 653 (84.8%) | 662 (86.3%) | 0.77†† | 0.40††        |
| 1 year                           | N   | 677         | 697         | 738         |        |               |
|                                  | yes | 575 (84.9%) | 589 (84.5%) | 639 (86.6%) | 0.82†† | 0.26††        |
| 30 months                        | N   | 576         | 587         | 666         |        |               |
|                                  | yes | 490 (85.0%) | 484 (82.5%) | 579 (86.9%) | 0.23†† | <b>0.03††</b> |
| <b>Manages money</b>             |     |             |             |             |        |               |
| Baseline                         | N   | 825         | 829         | 813         |        |               |
|                                  | yes | 751 (91.0%) | 763 (92.0%) | 750 (92.3%) | 0.46†† | 0.87††        |
| 3 months                         | N   | 756         | 769         | 767         |        |               |
|                                  | yes | 690 (91.3%) | 707 (91.9%) | 704 (91.8%) | 0.64†† | 0.91††        |
| 1 year                           | N   | 676         | 697         | 735         |        |               |
|                                  | yes | 638 (94.4%) | 651 (93.4%) | 682 (92.8%) | 0.45†† | 0.65††        |
| 30 months                        | N   | 574         | 586         | 664         |        |               |
|                                  | yes | 526 (91.6%) | 540 (92.2%) | 618 (93.1%) | 0.75†† | 0.53††        |
| <b>Working full or part time</b> |     |             |             |             |        |               |
| Baseline                         | N   | 830         | 833         | 816         |        |               |
|                                  | yes | 244 (29.4%) | 211 (25.3%) | 215 (26.4%) | 0.06†† | 0.64††        |
| 3 months                         | N   | 761         | 772         | 768         |        |               |
|                                  | yes | 214 (28.1%) | 197 (25.5%) | 196 (25.5%) | 0.25†† | 1.00††        |
| 1 year                           | N   | 681         | 698         | 740         |        |               |

Quality of Life with Defibrillator Therapy or Amiodarone in Heart Failure  
Mark D.B., et al.  
Supplementary Appendix

|                                          |        |                 |                  |                  |                    |                            |
|------------------------------------------|--------|-----------------|------------------|------------------|--------------------|----------------------------|
|                                          | yes    | 187 (27.5%)     | 159 (22.8%)      | 176 (23.8%)      | <b>0.04</b> ††     | 0.65††                     |
| 30 months                                | N      | 585             | 590              | 673              |                    |                            |
|                                          | yes    | 154 (26.3%)     | 131 (22.2%)      | 140 (20.8%)      | 0.10††             | 0.54††                     |
| <b>Living with Heart Failure (105-0)</b> |        |                 |                  |                  |                    |                            |
| Baseline                                 | N      | 824             | 819              | 805              |                    |                            |
|                                          | median | 42 (22,61)      | 43 (21,63)       | 41 (24,62)       |                    |                            |
|                                          | mean   | 42.0±24.6       | 43.1±25.6        | 42.6±24.1        | -1.08 (-3.51,1.35) | -0.50 (-2.92,1.93)         |
| 3 months                                 | N      | 745             | 750              | 736              |                    |                            |
|                                          | median | 33 (17,54)      | 36 (14,59)       | 30 (13,52)       |                    |                            |
|                                          | mean   | 36.7±24.2       | 37.6±25.6        | 33.7±23.6        | -0.89 (-3.42,1.63) | <b>-3.92 (-6.43,-1.42)</b> |
| 1 year                                   | N      | 638             | 666              | 704              |                    |                            |
|                                          | median | 33 (14,54)      | 36 (14,59)       | 32 (14,52)       |                    |                            |
|                                          | mean   | 35.6±24.6       | 37.8±26.3        | 34.7±23.6        | -2.16 (-4.93,0.61) | <b>-3.09 (-5.73,-0.45)</b> |
| 30 months                                | N      | 458             | 492              | 549              |                    |                            |
|                                          | median | 33 (14,55)      | 36 (17,59)       | 32 (15,52)       |                    |                            |
|                                          | mean   | 36.5±24.8       | 38.3±25.3        | 35.3±24.0        | -1.81 (-5.00,1.38) | <b>-3.04 (-6.04,-0.05)</b> |
| <b>Time Trade-Off (0-1)</b>              |        |                 |                  |                  |                    |                            |
| Baseline                                 | N      | 818             | 824              | 808              |                    |                            |
|                                          | median | 0.98 (0.8,1.0)  | 0.98 (0.8, 1.0 ) | 0.98 (0.8, 1.0)  |                    |                            |
|                                          | mean   | 0.8±0.3         | 0.8±0.3          | 0.8±0.3          | 0.01 (-0.02,0.04)  | -0.005 (-0.04,0.03)        |
| 3 months                                 | N      | 752             | 761              | 758              |                    |                            |
|                                          | median | 0.98 (0.8, 1.0) | 0.98 (0.8, 1.0)  | 0.98 (0.9, 1.0 ) |                    |                            |
|                                          | mean   | 0.8±0.3         | 0.8±0.3          | 0.9±0.3          | 0.015 (-0.02,0.05) | <b>0.04 (0.01,0.07)</b>    |
| 1 year                                   | N      | 667             | 694              | 728              |                    |                            |
|                                          | median | 0.98 (0.8, 1.0) | 0.98 (0.9, 1.0)  | 0.98 (0.8, ) 1.0 |                    |                            |
|                                          | mean   | 0.8±0.3         | 0.9±0.3          | 0.9±0.3          | 0.00 (-0.03,0.03)  | 0.00 (-0.03,0.03)          |
| 30 months                                | N      | 551             | 562              | 643              |                    |                            |

Quality of Life with Defibrillator Therapy or Amiodarone in Heart Failure  
Mark D.B., et al.  
Supplementary Appendix

|                                  |        |                 |                 |                 |                    |                         |
|----------------------------------|--------|-----------------|-----------------|-----------------|--------------------|-------------------------|
|                                  | median | 0.98 (0.8, 1.0) | 0.98 (0.9, 1.0) | 0.98 (0.9, 1.0) |                    |                         |
|                                  | mean   | 0.9±0.3         | 0.9±0.3         | 0.9±0.3         | 0.00 (-0.03,0.03)  | 0.00 (-0.03,0.03)       |
| <b>Self-rating scale (0-100)</b> |        |                 |                 |                 |                    |                         |
| Baseline                         | N      | 786             | 791             | 781             |                    |                         |
|                                  | median | 65 (50,80)      | 60 (50,80)      | 65 (50,80)      |                    |                         |
|                                  | mean   | 62.9±20.7       | 62.6±21.9       | 62.7±21.1       | 0.28 (-1.82,2.39)  | 0.09 (-2.03,2.22)       |
| 3 months                         | N      | 719             | 702             | 712             |                    |                         |
|                                  | median | 70 (50,80)      | 70 (50,80)      | 75 (50,85)      |                    |                         |
|                                  | mean   | 65.9±20.6       | 66.1±21.0       | 69.6±19.5       | -0.16 (-2.32,2.00) | <b>3.50 (1.39,5.61)</b> |
| 1 year                           | N      | 629             | 645             | 681             |                    |                         |
|                                  | median | 70 (50,85)      | 70 (50,85)      | 75 (51,85)      |                    |                         |
|                                  | mean   | 67.6±21.2       | 66.5±21.7       | 69.4±19.4       | 1.08 (-1.28,3.44)  | <b>2.90 (0.68,5.11)</b> |
| 30 months                        | N      | 506             | 529             | 599             |                    |                         |
|                                  | median | 70 (50,80)      | 70 (50,80)      | 70 (50,85)      |                    |                         |
|                                  | mean   | 67.1±20.9       | 66.1±21.9       | 68.0±21.1       | 1.01 (-1.60,3.63)  | 1.96 (-0.56,4.47)       |

Continuous variables shown as median (25<sup>th</sup> to 75<sup>th</sup> percentiles). Categorical variables are shown as percentages. Means are shown with standard deviations. AMIO = amiodarone; ICD = implantable cardioverter-defibrillator; SF = Short Form 36.

\* Columns show 95% confidence intervals for difference in mean values for continuous variables or in percentages for categorical variables (active treatment minus placebo). Intervals corresponding to a nominal p-value ≤0.05, uncorrected for multiple comparisons, are shown in bold.

†Ranges for each scale are provided in parenthesis

††Quantities shown are p-values.
